# Supplementary material
Source: ML conference proceedings conference paper supplement (https://openreview.net/forum?id=IxG4XmfXQC)
Supplement: supplementary_material [file attachment]

# What Matters in Autonomous Driving Anomaly Detection: A Weakly Supervised Horizon

## Supplementary Material

Anonymous ROAM ECCV 2024 Submission

Anonymous Authors

### 1 State-of-the-art Weakly-supervised Video Anomaly Detection Methods Architectural Framework

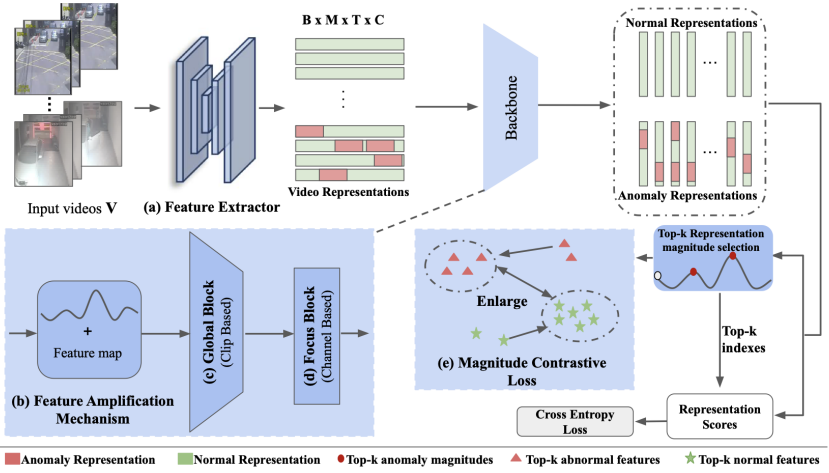

Fig. 1: MGFN. [1] Framework

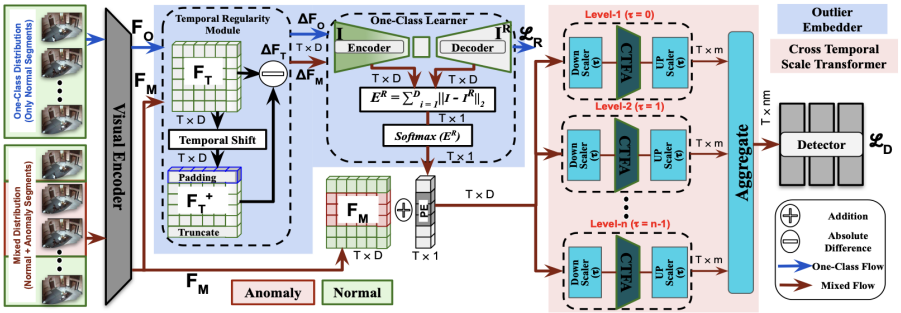

Fig. 2: OECTST [2] Framework

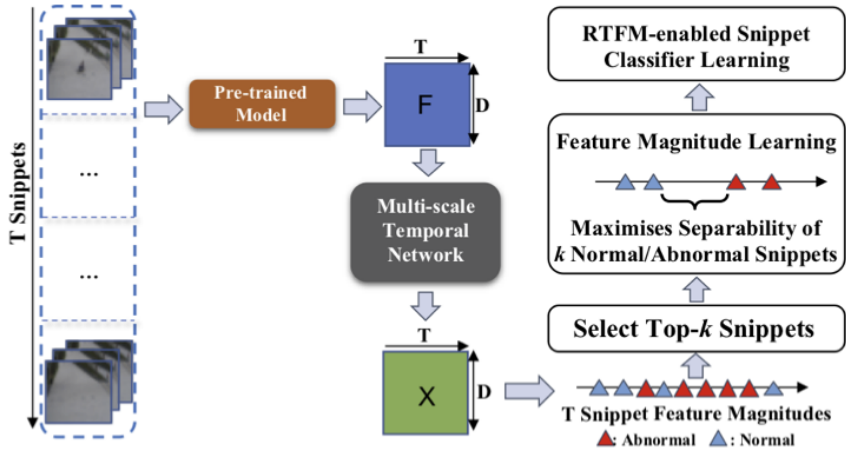

Fig. 3: RTFM [3] Framework

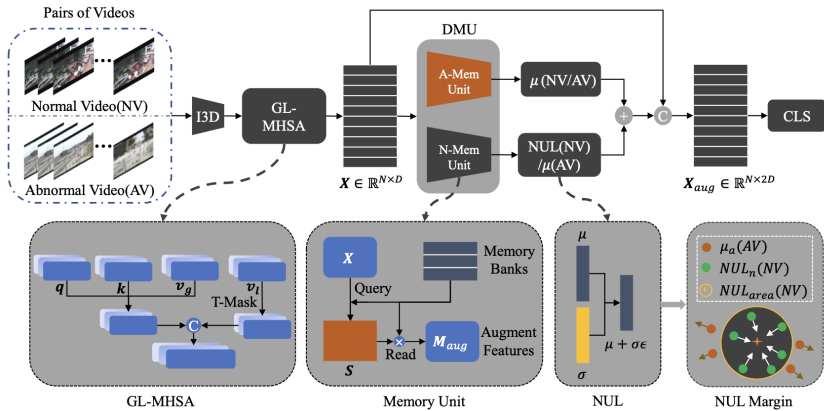

Fig. 4: UR-DMU [4] Framework

## 2 Additional Qualitative Results

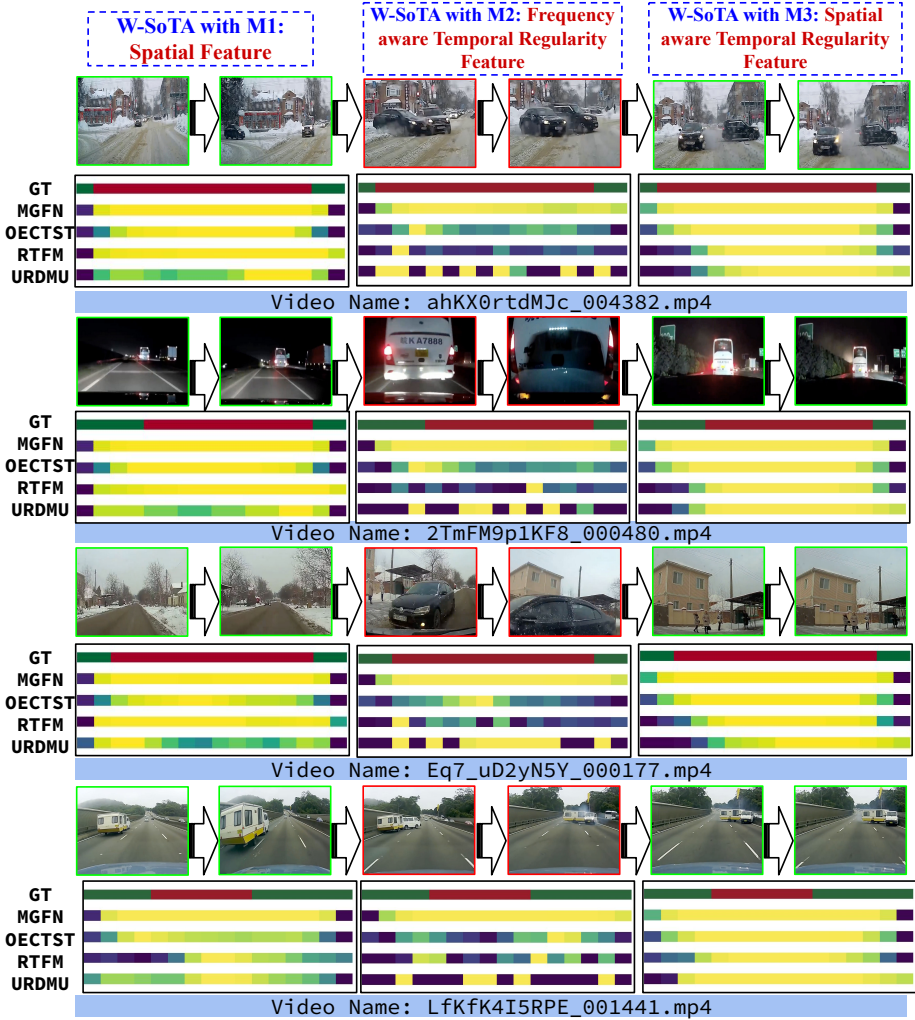

**Fig. 5:** Visualization of Ground truth vs. prediction heatmaps for SoTAs in with different feature mpas obtained from feature Transformation block (FTB). We portray such visualization for three challenging videos. More visualization can be found in appendix.

## References

1. Chen, Y., Liu, Z., Zhang, B., Fok, W., Qi, X., Wu, Y.C.: Mgnf: Magnitude-contrastive glance-and-focus network for weakly-supervised video anomaly detection. In: Proceedings of the AAAI Conference on Artificial Intelligence. vol. 37, pp. 387–395 (2023) [1](#)

2. Majhi, S., Dai, R., Kong, Q., Garattoni, L., Francesca, G., Brémond, F.: Oe-ctst: Outlier-embedded cross temporal scale transformer for weakly-supervised video anomaly detection. In: Proceedings of the IEEE/CVF winter conference on applications of computer vision. pp. 8574–8583 (2024) 1
3. Tian, Y., Pang, G., Chen, Y., Singh, R., Verjans, J.W., Carneiro, G.: Weakly-supervised video anomaly detection with robust temporal feature magnitude learning. In: Proceedings of the IEEE/CVF International Conference on Computer Vision. pp. 4975–4986 (2021) 2
4. Zhou, H., Yu, J., Yang, W.: Dual memory units with uncertainty regulation for weakly supervised video anomaly detection. arXiv preprint arXiv:2302.05160 (2023) 2
